1 Leveraging correlations between polygenic risk score predictors to  
2 detect heterogeneity in GWAS cohorts

3 Jie Yuan<sup>1</sup>, Henry Xing<sup>1</sup>, Alexandre Lamy<sup>1</sup>, The Schizophrenia Working Group of the  
4 Psychiatric Genomics Consortium, Todd Lencz<sup>2</sup>, and Itsik Pe'er<sup>1</sup>

5 <sup>1</sup>Department of Computer Science, Columbia University, New York

6 <sup>2</sup>The Center for Psychiatric Neuroscience, Feinstein Institutes for Medical Research, New  
7 York

8 October 31, 2019

## 9 **Abstract**

10 Evidence from both GWAS and clinical observation has suggested that certain psychiatric, metabolic, and  
11 autoimmune diseases are heterogeneous, comprising multiple subtypes with distinct genomic etiologies and  
12 Polygenic Risk Scores (PRS). However, the presence of subtypes within many phenotypes is frequently  
13 unknown. We present CLiP (Correlated Liability Predictors), a method to detect heterogeneity in single  
14 GWAS cohorts. CLiP calculates a weighted sum of correlations between SNPs contributing to a PRS on  
15 the case/control liability scale. We demonstrate mathematically and through simulation that among i.i.d.  
16 homogeneous cases, significant anti-correlations are expected between otherwise independent predictors due  
17 to ascertainment on the hidden liability score. In the presence of heterogeneity from distinct etiologies,  
18 confounding by covariates, or mislabeling, these correlation patterns are altered predictably. We further  
19 extend our method to two additional association study designs: CLiP-X for quantitative predictors in  
20 applications such as transcriptome-wide association, and CLiP-Y for quantitative phenotypes, where there  
21 is no clear distinction between cases and controls. Through simulations, we demonstrate that CLiP and its  
22 extensions reliably distinguish between homogeneous and heterogeneous cohorts when the PRS explains as  
23 low as 5% of variance on the liability scale and cohorts comprise 50,000 – 100,000 samples, an increasingly  
24 practical size for modern GWAS. We apply CLiP to heterogeneity detection in schizophrenia cohorts totaling  
25 > 50,000 cases and controls collected by the Psychiatric Genomics Consortium. We observe significant  
26 heterogeneity in mega-analysis of the combined PGC data (p-value  $8.54e-4$ ), as well as in individual cohorts  
27 meta-analyzed using Fisher’s method (p-value 0.03), based on significantly associated variants.

## 28 1 Introduction

29 In recent years Genome-Wide Association Studies (GWAS) have identified thousands of genomic risk factors  
30 and generated insights into disease etiologies and potential treatments [1, 2, 3]. Increasingly, there has been  
31 interest in advancing beyond these associations towards obtaining a deeper understanding the mechanisms  
32 by which genomic factors influence disease [1, 4]. These require models beyond simply combining linear  
33 effects of variants, as they often modulate phenotypes indirectly, though the expression of other genes [5, 6].

34 One such avenue has concerned the apparent heterogeneity of diseases which has not been sufficiently  
35 recognized by GWAS: while individuals in cohorts for these studies are frequently classified simply as cases or  
36 controls, clinical evidence for several GWAS traits have suggested that there are multiple different subtypes  
37 of diseases consisting of distinct sets of symptoms and association with distinct rare risk alleles [7, 8].  
38 For example, polygenic risk scores for major depressive disorder explain more of the phenotypic variance  
39 when cases are partitioned into two known subtypes (typical and atypical), and the two subtypes exhibit  
40 polygenicity with distinct traits [9]. Similarly, by separating bipolar disorder into its two known subtypes,  
41 corresponding to manic and hypomanic episodes, distinct polygenic risk scores comprising different associated  
42 SNPs are discovered, with genetic correlation being significantly lower than when individuals are partitioned  
43 otherwise, e.g. by batch. Additionally, only the manic subtype shares a high degree of pleiotropy with  
44 schizophrenia [10]. Aside from psychiatric traits, heterogeneity of genomic associations between known  
45 subtypes has been observed in diseases such as lupus [11], multiple sclerosis [12], epilepsy [13], encephalopathy  
46 [14], and juvenile idiopathic arthritis [15]. Elucidating the nature of heterogeneity in these traits may also  
47 play a role in addressing the missing heritability problem in GWAS, as hidden heterogeneity reduces power  
48 to detect SNP associations [16].

49 Heterogeneity in disease etiology has also become a concern for clinical applications, as the predictive  
50 accuracy polygenic risk scores is known to vary across different demographics of patients. As most genomic  
51 studies to date have been conducted on primarily Northern European populations, accuracy of the predictors  
52 they develop, measured as R-squared, is lower in other populations, raising the possibility of inequities in  
53 care by the direct application of these PRSs [17]. Even if these concerns are mitigated by future large  
54 studies conducted in under-served populations, recent work has shown that PRS accuracy further varies

55 across other covariates such as age and sex [18]. Therefore, methods to develop population-differentiated  
56 PRSs and detect deficiencies in existing PRSs are urgently needed before predictive genomics can be widely  
57 integrated into precision medicine.

58 To date there have been only few strategies to identify subtypes in GWAS cohorts, largely due to  
59 two challenges: the very small signals typically found in polygenic traits, and the presence of confounding  
60 sources of heterogeneity such as batch effects. One method [19] purports to discover strong evidence of  
61 subtyping in schizophrenia by non-negative matrix factorization of the cohort genotype data, interpreting  
62 the hidden factors as different subtypes. However, this work failed to take into account alternative sources  
63 of heterogeneity such as population stratification and linkage disequilibrium, that might produce spurious  
64 results [20, 21]. Another method, reverse GWAS [22], applies a Bayesian latent factor model to partition  
65 SNP effect sizes and individual membership into a set of latent subtypes so that the likelihood of phenotype  
66 predictions within each subtype is maximized. The method is reported to detect subtypes that may be  
67 suggestive of clinical implications, such as a possible differential effect of statins on blood glucose levels.  
68 However, this approach is under-powered to detect heterogeneity in single phenotypes, and thus is geared  
69 for simultaneous predictions across multiple observed phenotypes. Additionally, many of these phenotypes  
70 are quantitative, which allows for more accurate estimation of effect sizes, and thus more accurate subtyping,  
71 than in case/control phenotypes. Therefore methods of this flavor may struggle to detect subtypes among  
72 single case/control phenotypes, in which the quantitative liability score is hidden.

73 Within-phenotype heterogeneity has also surfaced as a possible confounding factor in the discovery of  
74 pleiotropic associations between phenotypes [23]. Assuming a GWAS model of disease risk, ideal pleiotropy  
75 would involve a single variant significantly associated with two observed phenotypes, producing a genomic  
76 correlation between those phenotypes. However, the presence of distinct subtypes in one or both pheno-  
77 types may alter the conclusions derived from pleiotropic analysis. For example, two additional subtypes of  
78 depression have been characterized by either episodic or persistent experiences of low mood. Of the two, the  
79 persistent subtype is more closely associated with childhood maltreatment, and only in persistent cases is  
80 an association found between childhood maltreatment and a particular variant of the serotonin transporter  
81 gene [24, 25]. Misclassification is another possible source of heterogeneity leading to spurious pleiotropic

82 relationships between phenotypes. For example, a significant percentage of patients diagnosed with either  
83 bipolar disorder or schizophrenia have their diagnoses later corrected to reflect the other disease [26]. As  
84 bipolar disease and schizophrenia are understood to be highly pleiotropic [27, 28, 29], these misclassifications  
85 have the potential to skew analyses of genetic correlation between the two phenotypes.

86 Recent work by Han et al. [30] has sought to address the detection of heterogeneity specifically in  
87 the context of pleiotropic phenotypes. The proposed method, BUHMBOX, operates on a matrix comprising  
88 cases for one disease genotyped over the associated SNPs for a second disease. When only a subset of cases  
89 are also cases for a second disease, individuals within that subset will exhibit a slightly higher ascertainment  
90 for the risk alleles included in the matrix. In a non-heterogeneous pleiotropic scenario, these risk alleles  
91 would instead be randomly distributed among all included individuals rather than co-occurring in a subset.  
92 When multiple risk alleles are overrepresented in a subset, they are positively correlated across all individuals  
93 in the matrix, and these positive correlations serve as evidence of heterogeneity.

94 We propose a generalized method called CLiP (Correlation of Liability Predictors) that leverages  
95 these correlations more broadly to detect multiple forms of heterogeneity in even single-trait GWAS, rather  
96 than strictly in two labeled pleiotropic traits. The goals of this work are threefold: First, we demonstrate  
97 that in a homogeneous (null) cohort of cases in a case/control study, predictors with effect sizes of the same  
98 sign are not uncorrelated as stated by Han et al. [30] but negatively correlated, and are expected to produce  
99 negative heterogeneity scores. This is a mathematical consequence of both logistic and liability threshold  
100 models despite independent sampling of predictors over the entire cohort. We evaluate the power of CLiP  
101 across realistic GWAS scenarios, and demonstrate its utility by identifying heterogeneity in schizophrenia.  
102 Although previous methods have attempted to partition SNPs or individuals into distinct clusters, the  
103 highly polygenic nature of most phenotypes renders these methods under-powered for single trait GWAS  
104 even when data sizes are very large. CLiP aggregates signals across all associated SNPs to generate a single  
105 score, permitting users to flag heterogeneous data sets for further study. Second, we develop an extension  
106 of CLiP to accommodate parameters that are not binomial genotypes, but rather continuous predictors  
107 such as expression data, which we term CLiP-X. Finally, we further extend CLiP to identify heterogeneous  
108 subgroups in quantitative phenotypes, where no clear delineation between cases and controls exists, by

109 weighting correlations according to polygenic risk scores, which we term CLiP-Y.

## 110 2 Methods

111 From a GWAS perspective, heterogeneity can be interpreted broadly as the presence of distinct mixtures  
112 of cases within a cohort which have been identified as cases through different PRSs. We define two models  
113 for generating genotype matrices of heterogeneous cohorts: First, *misclassification*, whereby a subset of  
114 individuals are not really cases, but have been rather labeled as such despite genetically being controls.  
115 This may occur due to erroneous phenotyping, but it may also suggest distinct disease etiologies, some of  
116 which are not ascertained for the PRS of interest. Second, a *mixture* of unobserved sub-phenotypes with  
117 distinct PRSs. A case is observed if the individual passes the liability threshold of at least one of these  
118 sub-phenotype PRSs. Figure 1 displays idealized genotype matrices and correlation matrices for each of  
119 these models along with the homogeneous null scenario, in which all cases are selected according to the same  
120 PRS. The column set  $S$  comprises associated SNPs reported in GWAS summary statistics, with the counted  
121 allele selected so that the corresponding effect size is positive. As described in Results, associated SNPs  
122 participating in the same PRS are negatively correlated over a set of cases selected according to that PRS  
123 (panel **B**). When the cohort comprises both cases and misclassified controls, the pattern of ascertainment of  
124 risk-alleles is consistent for particular individuals across all SNPs, resulting in positive correlations between  
125 SNPs (panel **D**). Panel **E** depicts a mixture scenario with two hidden disjoint PRSs. Individuals labeled as  
126 cases of the observed phenotype may be in reality a case for sub-phenotype 1 only (blue), sub-phenotype 2  
127 only (orange), whereas controls are observed as such (grey). The presence of cases for multiple hidden sub-  
128 phenotypes produces a mixture of positively and negatively correlated SNPs depending on the membership  
129 of the compared SNPs (panel **G**).

130 The goal of CLiP is to distinguish this heterogeneous cohort from one that comprises only cases  
131 and controls for a single PRS. In the following sections, we first describe a correction (CLiP) to the way  
132 heterogeneity scores had been used [30], where we account for negative correlations which are expected of  
133 case/control data sampled from a logistic or liability threshold model. Next we present adaptations of this  
134 general method to studies with quantitative predictors such as expression measurements rather than SNPs

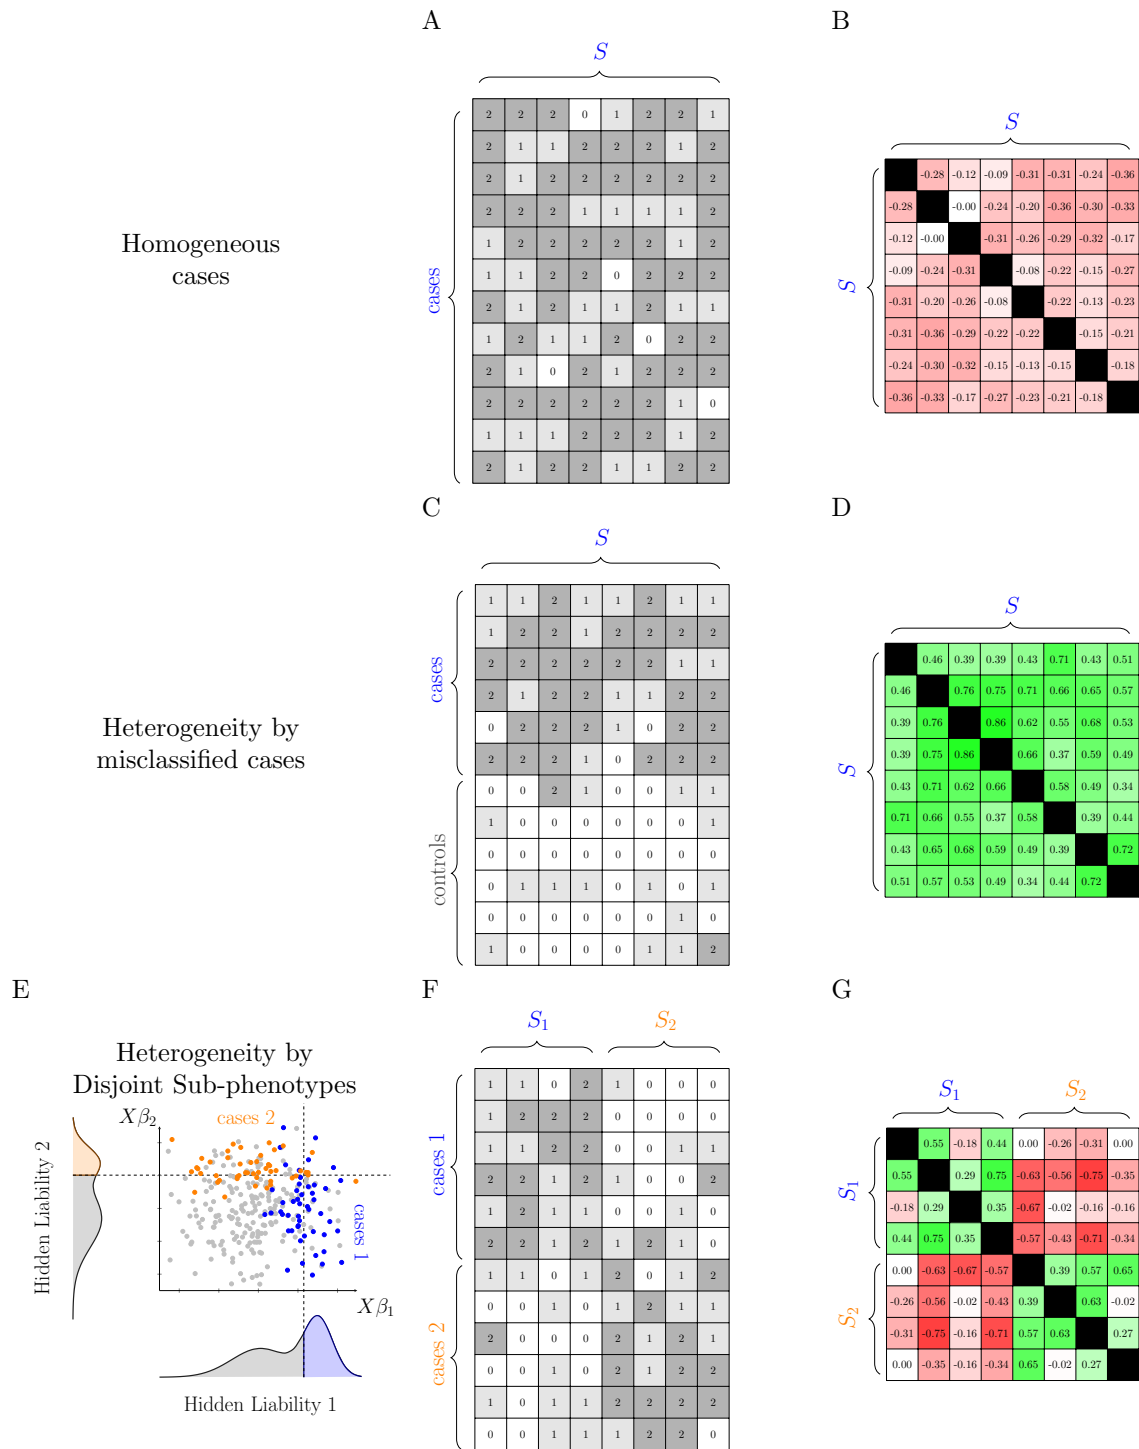

Figure 1: Cartoon examples of genotype matrices (**A,C,F**) and SNP correlation matrices (**B,D,G**) expected of homogeneous and heterogeneous case cohorts. For homogeneous cases (**A,B**), SNPs are uniformly ascertained, but negative correlations exist between any pair of associated SNPs. For heterogeneous cases comprising a mixture of true cases and misclassified controls (**C,D**), SNPs are ascertained in a subset of individuals, creating positive correlations between SNPs. For heterogeneous cases comprising disjoint sub-phenotypes (**E,F,G**), associated SNP subsets  $S_1$  and  $S_2$  pertain to two independent PRSs, and passing the threshold of at least one of these PRSs is sufficient to select a case (**E**). Genotypes sampled from this model produce a mixture of positive and negative correlations.

135 (CLiP-X), and also with quantitative phenotypes for which there is no definition of a “case” (CLiP-Y). Next  
136 we describe the generative process for simulations of homogeneous and heterogeneous PRS data used to test  
137 the performance of these methods.

## 138 2.1 CLiP: Correcting for negative correlation bias

139 CLiP calculates the same heterogeneity score as previous work [30], but adjusts the null distribution to  
140 account for expected correlations between SNPs when the cohort is homogeneous. Calculation of this  
141 adjustment and verification by simulations are shown in the Results and Supplemental Note. The test is  
142 performed over a genotype matrix  $X$  comprising  $N$  cases and  $M$  SNPs counting the number of risk-alleles,  
143 as well as a matrix of controls  $X^0$  with  $N^0$  individuals. Pairwise SNP correlations are calculated over cases  
144 and controls separately and stored in  $R$  and  $R^0$  respectively. These correlations are then compared against  
145 their null expected values. The expected correlation among controls,  $\mathbb{E}[R_{jk}^0]$ , is always 0 in practice as SNPs  
146 are sampled independently, but is included below for clarity. This modified heterogeneity score is computed  
147 as follows:

$$S_{het}(X, X^0) = \frac{\sum_{j=1}^M \sum_{k=j+1}^M w_j w_k (R_{jk} - R_{jk}^0 - \mathbb{E}[R_{jk} - R_{jk}^0])}{\sqrt{\frac{N+N^0}{NN^0}} \sqrt{\sum_{j=1}^M \sum_{k=j+1}^M w_j^2 w_k^2}} \quad (1)$$

148 where

$$w_j = \frac{p_j \sqrt{1 - p_j} (\gamma_j - 1)}{(\gamma_j - 1) p_j + 1} \quad (2)$$

149 The score  $S_{het}$  is a weighted sum of difference in correlation between cases and controls, to account for  
150 prior sources of SNP-SNP correlation such as ancestry. A high score resulting from a bias towards positive  
151 correlations would indicate the presence of subtypes with differing ascertainment for the included risk-alleles,  
152 and thus heterogeneity. The weights are intended to adjust the score’s sensitivity to certain SNPs based  
153 on their allele frequency  $p$  and odds ratio  $\gamma$ , with larger odds ratios and frequencies close to 0.5 producing  
154 greater weights.



## 155 **2.2 CLiP-X: Heterogeneity Detection with quantitative predictors**

156 While comorbidity subtypes may occur in transcriptome-wide association studies, the heterogeneity score  
157 cannot be computed directly over continuously distributed gene expression variables rather than discrete  
158 SNPs. In CLiP, the weights  $w$  are important for scaling the contributions of individual SNPs to the final  
159 heterogeneity Z-score, and they are dependent on risk-allele frequencies and odds ratios, quantities not  
160 strictly defined for continuous variables. In the case of binary variables, higher weights are assigned to SNPs  
161 with more extreme risk-allele frequencies as well as effect sizes, as these variables are more likely to generate  
162 highly positive correlations in the presence of heterogeneity. Here we generalize this weighting scheme  
163 to accommodate arbitrarily distributed continuous input variables, which may be applied in particular to  
164 expression analyses.

## 165 **2.3 CLiP-X Simulation Procedure**

166 To fully simulate expression variables as modeled in transcriptome-wide association, expression predictors  
167 are generated from a linear model of randomly sampled genotypes, rather than directly sampling expression.  
168 Although the input into CLiP-X includes only the expression variables, explicitly modeling the genotype  
169 layer allows for inclusion of prior correlations resulting from SNPs associated with multiple transcripts,  
170 rather than from the liability threshold model.

171 For a single case-control phenotype, transcript effect sizes  $\alpha$  are fixed so that the variance explained  
172 of all modeled transcripts is a desired value. Likewise, genotype-transcript effect sizes  $\beta$  are also fixed  
173 so that variance explained of each transcript by genomic variants is a second specified value. Although  
174 fixing effect sizes at the genotype-transcript layer is admittedly unrealistic, the results are only simplified  
175 when these interactions are removed, with no interactions reducing to expression sampled from the standard  
176 normal distribution. Cases are determined according to the liability threshold model. For an individual  $i$   
177 in transcript matrix  $Z$ , a hidden quantitative liability score  $y_i^*$  is calculated, with the variance of error  $\epsilon$   
178 set so that  $y^*$  has a total variance of 1. The observed case/control label  $y_i$  is set according to whether  $y_i^*$   
179 passes the liability scale threshold  $T$ , which is placed on the standard normal distribution so that affected  
180 individuals constitute a prevalence of 0.01.

$$y_i^* = \sum_{j=1}^L Z_{ij} \alpha_j + \epsilon$$
$$y_i = \begin{cases} 1 & \text{if } y_i^* \geq T \\ 0 & \text{if } y_i^* < T \end{cases} \quad (3)$$

181 To generate cases and controls, we iteratively generate batches of transcripts by random sampling, and  
182 compile those that pass or fail the threshold cutoff into case and control cohorts. We generate heterogeneous  
183 cohorts, by concatenating simulated cases and controls, with the fraction of cases  $\pi$  set to 0.5 for simplicity.  
184 We reasoned that this procedure was a conservative representation of a large number of possible heterogeneity  
185 scenarios including those with multiple independent sub-phenotypes. If the PRSs of these sub-phenotypes  
186 are independent, then a large number of correlations between predictors will be evaluated close to zero,  
187 resulting in a score very different from the homogeneous null. A full description of the simulation procedure  
188 is provided in Supplemental Algorithm 1 and illustrated in Supplemental Figure S2. Note that the variance  
189 of the random noise  $\epsilon$  in Equation 3 is determined by the desired total variance explained by the simulated  
190 genotypic variables  $h^2$ :

$$Var(\epsilon) = \frac{1 - h_{EXP}^2}{h_{EXP}^2} Var\left(\sum_{j=1}^L \alpha_j Z_j\right) \quad (4)$$

### 191 2.3.1 Characterizing correlations between continuous variables

Given  $N \times L$  matrices of quantitative expression measurements  $Z$  among cases and  $Z^0$  among controls, we would like to determine whether  $Z$  comprises a homogeneous or heterogeneous set of cases as generated in Supplemental Algorithm 1. When  $Z$  is heterogeneous, we assume the individuals in  $Z$  can be assigned to one of two subtypes: one sampled according to the liability threshold model for the simulated phenotype, and one sampled randomly as controls. For a given predictor indexed by  $j \in [1, \dots, L]$ , assume  $Z_{ij}$  is sampled according to a mean and variance specific to the subtype of individual  $i$ , denoted by  $Z_{i\cdot}^+$  for the case subtype and  $Z_{i\cdot}^-$  for the control subtype. The distribution of the variables need not be discrete or even

normally distributed, as the heterogeneity score is computed from correlations, which in turn rely only on the mean and variance of the input variables. Therefore the score can be calculated assuming any probability distribution provided that the mean and standard deviation are obtainable. For an arbitrary probability distribution  $\mathcal{D}$  parameterized by its mean and standard deviation, we have:

$$\begin{aligned} X_{.j}^+ &\sim \mathcal{D}(\mu_j^+, \sigma_j^+) \\ X_{.j}^- &\sim \mathcal{D}(\mu_j^-, \sigma_j^-) \end{aligned} \tag{5}$$

192 Assume that the proportion of individuals belonging to the group + is  $\pi$ . For a homogeneous group of  
 193 case,  $\pi = 0$ , and our simulations assume  $\pi = 0.5$ , but in practice this proportion is unknown. Incorporating  
 194 this proportion allows the redefinition of expectations over the entire cohort as weighted sums of the expect-  
 195 tations over the subgroups. The expected correlation evaluated over the entire group can then be calculated  
 196 according to within-group expectations:

$$\begin{aligned} r_{jk} &= \frac{\mathbb{E}[Z_j Z_k] - \mathbb{E}[Z_j]\mathbb{E}[Z_k]}{\sqrt{\text{Var}(Z_j)}\sqrt{\text{Var}(Z_k)}} \\ &= \frac{\mathbb{A}_\pi(\mathbb{E}[Z_j^+ Z_k^+], \mathbb{E}[Z_j^- Z_k^-]) - \mathbb{A}_\pi(\mu_j^+, \mu_j^-) \mathbb{A}_\pi(\mu_k^+, \mu_k^-)}{\sqrt{\mathbb{A}_\pi(\mathbb{E}[(Z_j^+)^2], \mathbb{E}[(Z_j^-)^2]) - \mathbb{A}_\pi(\mu_j^+, \mu_j^-)^2} \\ &\quad \cdot \sqrt{\mathbb{A}_\pi(\mathbb{E}[(Z_k^+)^2], \mathbb{E}[(Z_k^-)^2]) - \mathbb{A}_\pi(\mu_k^+, \mu_k^-)^2} \end{aligned} \tag{6}$$

197 where  $\mathbb{A}_\pi(x, y) = \pi x + (1 - \pi)y$ .

### 198 2.3.2 Definition of weights for continuous variables

199 We would like to make use of these expectations over correlations by incorporating them as weights in the  
 200 heterogeneity score as in Han et al. [30]. As predictors with high mean differences between subgroups and  
 201 high effects are expected to contribute more signal to the score, weighting them higher than other predictors  
 202 will increase power to detect heterogeneity. Therefore, we would like to define a set of weights  $w_{ij}$  for each  
 203 expected  $r_{ij}$ .

204 We derive the weights for continuous variables in an analogous manner to Han et al. [30], by taking

205 the derivative of the expected sample correlation with respect to  $\pi$  at the null value,  $\pi = 0$ .

$$w_{jk} = \left. \frac{\partial}{\partial \pi} r_{jk} \right|_{\pi=0} \quad (7)$$

206 To facilitate calculation of  $\mathbb{E}[Z_j^+ Z_k^+]$  and  $\mathbb{E}[Z_j^- Z_k^-]$  in equation 6, we assume as in [30] that within  
 207 a subgroup of cases or controls, the correlation between any two predictors, even those associated with the  
 208 phenotype, is zero. This allows us to express expectations of products as products of expectations. Note  
 209 that this does not mean that correlations over the entire cohort  $\mathbb{E}[Z_j Z_k]$  are zero: these correlations are  
 210 calculated inclusive of all subgroups, and their nonzero correlations are what determines the heterogeneity  
 211 score. We demonstrate in the Results that theoretically and by simulation this assumption is violated in  
 212 logistic and liability threshold models.

213 Given the assumption of no correlation within subgroups, the correlation between two variables  $Z_{.j}$   
 214 and  $Z_{.k}$  can be expressed as the following. For further details on the derivation, please see the Supplemental  
 215 Note.

$$w_{jk} = \frac{\mu_j^+ \mu_k^+ - \mu_j^+ \mu_k^- - \mu_j^- \mu_k^+ + \mu_j^- \mu_k^-}{\sigma_j^- \sigma_k^-} \quad (8)$$

$$= \frac{(\mu_j^+ - \mu_j^-)(\mu_k^+ - \mu_k^-)}{\sigma_j^- \sigma_k^-} \quad (9)$$

216 The same weights defined in Han et al. [30] for Bernoulli variables is a special case of this general  
 217 formulation. These weights can now be substituted into the heterogeneity score.

218 In practice we do not know the value of  $\mu_j^+$  because the membership of individuals in each of the  
 219 subsets is unknown. However, we do know the mean values of the heterogeneous case group which we denote  
 220 as  $\mu_j$ . We can use this value as an approximation for  $\mu_j^+$ , and calculate an approximate weight:

$$\hat{w}_{jk} = \frac{(\mu_j - \mu_j^-)(\mu_k - \mu_k^-)}{\sigma_j^- \sigma_k^-} \quad (10)$$

221 We can also quantify the errors we are making by this approximation. We have the following rela-

222 tionship for any distribution of the genotype random variables:

$$\mu_j = \mathbb{A}_\pi(\mu_j^+, \mu_j^-) \quad (11)$$

223 The approximation in Eq. 10 will attenuate the magnitude of  $\mu_j^+$  with respect to the true value of the  
224 weight. However, we also see that:

$$\frac{\hat{w}_{ij}}{w_{ij}} = \frac{[\mathbb{A}_\pi(\mu_j^+, \mu_j^-) - \mu_j^-][\mathbb{A}_\pi(\mu_k^+, \mu_k^-) - \mu_k^-]}{(\mu_j^+ - \mu_j^-)(\mu_k^+ - \mu_k^-)} = \pi^2 \quad (12)$$

225 As each weight is scaled by a constant factor, their relative magnitudes are unchanged. Consequently,  
226 the heterogeneity score for continuous input variables does not change after this approximation. Thus we  
227 can still achieve optimal estimates of heterogeneity despite lacking access to the true mean for the underlying  
228 case subgroup.

## 229 2.4 CLiP-Y: Heterogeneity Detection in Quantitative Phenotypes

230 The basic CLiP test for heterogeneity relies on differential enrichment of SNP effect sizes or odds ratios  
231 across subtypes, and thus requires ascertainment for cases. But one can presume that heterogeneity exists  
232 in quantitative phenotypes as well; e.g., are there distinct genetic mechanisms predisposing individuals  
233 to being tall? But extending this method to quantitative phenotypes presents a challenge as there is no  
234 dichotomous delineation between cases and controls. A naive solution may be to pick an arbitrary z-  
235 score as a threshold and denote samples who score higher as “cases” and those lower as “controls.” This  
236 introduces a trade-off between sample size and signal specificity, as lowering this threshold provides more  
237 samples for the correlation analysis but also introduces more control-like samples which will attenuate SNP  
238 associations, and the correlations themselves. A more principled method would allow for the inclusion of  
239 all continuous samples, but give higher weight to those with large polygenic SNP scores. Thus we propose  
240 to score heterogeneity by a weighted correlation with polygenic risk scores serving as a measure of the  
241 importance of a sample in the case set. These weights determine the degree to which individuals count as a  
242 “case”, and therefore their contribution to the total heterogeneity score of the genotype matrix. Artificially

243 creating the two groups by applying a hard threshold over the quantitative phenotype values is a special  
244 case of this method with a step function as the weighting scheme, equally weighting all individuals above  
245 the threshold “step.”

## 246 2.5 CLiP-Y Simulation Procedure

247 Here SNPs as input predictors are sampled directly from binomial distributions with fixed minor allele  
248 frequency of 0.5. The quantitative phenotype  $y$  is calculated from the PRS score with normally distributed  
249 noise added according to the desired PRS variance explained. As in the CLiP-X simulation procedure, we  
250 generate heterogeneous cohorts by concatenating a subset of cases and controls together into a single putative  
251 set of cases according to the fraction  $\pi$ . For quantitative phenotypes, the “control” subset is generated so  
252 that the quantitative phenotype value is simply sampled from the normal distribution with zero PRS variance  
253 explained. A more detailed description of the simulation procedure is provided in Supplemental Algorithm  
254 2.

### 255 2.5.1 Definition of individual weights by phenotype values

We define a weight over individuals such that those with higher phenotype values contribute more strongly to the heterogeneity score. For a cohort of  $N$  individuals let  $X_{ij} \in \{0, 1, 2\}$  be the number of risk alleles of SNP  $j$  in individual  $i$ , and let  $Y = (y_1, \dots, y_N)$  values of quantitative trait 1 for the respective individuals. We introduce a normalized weight vector across the  $N$  individuals defined as  $\phi \in \mathbb{R}^N$  such that  $\forall i, \phi_i \geq 0$  and  $\sum_i \phi_i = 1$ . Most intuitively we would define  $\phi \equiv \phi(\mathcal{F})$ , where the weight values would reflect normalized scaling of the trait  $\phi_i = \frac{\mathcal{F}(y_i)}{\sum_j \mathcal{F}(y_j)}$  by a monotone function  $\mathcal{F}$ . Dichotomous, case/control weighting is the special case of:

$$\mathcal{F}^{01}(y_i) = \begin{cases} 1 & \text{case} \\ 0 & \text{control} \end{cases}$$

256 Uniform weighting is obtained by  $\mathcal{F}^1(y_i) \equiv 1$ . To obtain the optimal weight function which most clearly  
257 contrasts the scores of heterogeneous and homogeneous cohorts, we tested several possible functions and  
258 also performed a local search over polynomials of arbitrary degree by iteratively updating and testing the

259 performance of individual polynomial coefficients. This local search is described in detail in Supplemental  
260 Algorithm 3. First, a small number of homogeneous and heterogeneous cohorts are generated as described  
261 before. These serve as the training data by which the weight function is optimized. All weight functions are  
262 applied over the raw phenotype values directly, or their conversion to percentiles in the sample distribution,  
263 in the range  $[0,1]$ . After initially randomizing a set of coefficients, at each iteration, a coefficient is randomly  
264 selected and incremented by a random quantity sampled from a normal distribution. The resulting polyno-  
265 mial is tested against the training data, and the change to the coefficient is kept if the difference in score  
266 between heterogeneous and homogeneous cohorts increases. After a set of high-performing weight functions  
267 are selected, they are each evaluated against a larger sample of validation data comprising homogeneous and  
268 heterogeneous cohorts as before. Of these candidates, the polynomial that performs best on the validation  
269 data is selected.

### 270 2.5.2 Definition of weighted correlations

271 To compute correlations we define, for each SNP  $j$ , a random variable  $u_j^\phi$  with values in  $\{0, 1, 2\}$  by sampling  
272 from the genotypes of the sample cohort  $X_{.j}$  with probability equal to the weight  $\phi_i$  assigned to each  
273 individual  $i$ . Rather than calculate the correlations directly over SNPs in  $X$ , we now calculate correlations  
274 over these random variables. We omit the superscript  $\phi$  in  $u^\phi$  when it is clear from context. For a single  
275 SNP  $j$ , we define the weighted mean value across  $N$  individuals as:

$$\mathbb{E}[u_j] = \sum_{i=1}^N \phi_i X_{ij} \quad (13)$$

Between two SNPs  $j$  and  $k$ , we define the weighted covariance as:

$$\begin{aligned} \text{Cov}(u_j, u_k) &= \mathbb{E}[(u_j - \mathbb{E}[u_j])(u_k - \mathbb{E}[u_k])] \\ &= \sum_{i=1}^N \phi_i (x_{ij} - \mathbb{E}[u_j])(x_{ik} - \mathbb{E}[u_k]) \end{aligned} \quad (14)$$

We define the weighted correlation matrix  $R^\phi$  for any weighting  $\phi$  as:

$$\begin{aligned} R_{jk}^\phi &= \text{Corr}(u_j^\phi, u_k^\phi) \\ &= \frac{\text{Cov}(u_j^\phi, u_k^\phi)}{\sqrt{\text{Cov}(u_j^\phi, u_j^\phi)\text{Cov}(u_k^\phi, u_k^\phi)}} \end{aligned} \quad (15)$$

276 The heterogeneity score tallies the entries of the upper-triangular correlation matrix for the phenotype-  
 277 weighted individuals  $R^{\phi(\mathcal{F})}$ . As we now lack a held-out set of controls to cancel the contribution of correla-  
 278 tions unrelated to the phenotype, we instead calculate a conventional correlation uniformly weighted across  
 279 all individuals  $R_0 \equiv R^{\phi(\mathcal{F}^1)}$ . Additionally, we introduce a scaling factor of  $\sqrt{(\sum_{i=1}^N \phi_i^2) - \frac{1}{N}}$  to correct for  
 280 the change in variance resulting from re-weighting the correlation according to individual weights  $\phi_i$ . These  
 281 changes produce the following preliminary heterogeneity score for quantitative phenotypes:

$$Q = \frac{\sum_{j=1}^M \sum_{k=j+1}^M R_{jk}^\phi - R_{jk}^0}{\sqrt{(\sum_{i=1}^N \phi_i^2) - \frac{1}{N}}} \quad (16)$$

282 Lastly, we incorporate into the test statistic  $Q$  a weighting scheme over SNPs as described in Han  
 283 et al. [30]. This second set of weights  $\mathbf{w} \in \mathbb{R}^M$  is introduced to correct for larger contributions to the score  
 284 by SNPs with large effect sizes or risk allele frequencies close to 0.5. These weights apply to SNPs, and  
 285 should not be confused with the weights  $\phi$  over individuals. For each SNP  $j$ , we define  $p_j^\phi \equiv \frac{\mathbb{E}[u_j^\phi]}{2}$ , the  
 286 sample allele frequency weighted by the individual phenotype, as opposed to the unweighted allele frequency  
 287  $p_j^0 \equiv p_j^{\phi(\mathcal{F}^1)}$ . The contribution of SNP  $j$  to the heterogeneity score is then scaled by

$$w_j^\phi = \frac{\sqrt{p_j^0(1-p_j^0)}(\gamma_j^\phi - 1)}{((\gamma_j^\phi - 1)p_j^0 + 1)} \quad (17)$$

288 where

$$\gamma_j^\phi = \frac{p_j^\phi(1-p_j^\phi)}{p_j^0(1-p_j^0)} \quad (18)$$

289 is a weighted generalization of an odds ratio. These weights are analogous to those found in Han et al. [30],  
 290 where given case allele frequency  $p_j^+$ , control allele frequency  $p_j^0$ , and sample odds ratio  $\gamma_j = \frac{p_j^+(1-p_j^+)}{p_j^0(1-p_j^0)}$ , the



291 weight is

$$w_j = \frac{\sqrt{p_j^0(1-p_j^0)}(\gamma_j - 1)}{((\gamma_j - 1)p_j^0 + 1)} \quad (19)$$

292 .

293 Combining these intermediate calculations, the heterogeneity test statistic for continuous phenotypes  
294 is:

$$S_{het}(X, y) = \frac{\sum_{j=1}^M \sum_{k=j+1}^M w_j^\phi w_k^\phi (R_{jk}^\phi - R_{jk}^0)}{\sqrt{\sum_{i=1}^N \phi_i^2 - \frac{1}{N}} \sqrt{\sum_{j=1}^M \sum_{k=j+1}^M (w_j^\phi)^2 (w_k^\phi)^2}} \quad (20)$$

295 For high  $N$ , this test statistic approaches the standard normal distribution, and can be evaluated as  
296 a z-score hypothesis test.

297 Note that even when applying a dichotomous weighting scheme, dividing the cohort with quantita-  
298 tive phenotypes into artificial cases and controls, CLiP-Y still differs slightly from a direct application of  
299 the case/control score. If a dichotomous weight function produces  $N^\phi$  artificial cases, the scaling factor  
300  $\frac{1}{\sqrt{\sum_{i=1}^N \phi_i^2 - \frac{1}{N}}}$  simplifies to  $\sqrt{\frac{N^\phi N}{N - N^\phi}}$  instead of the slightly smaller  $\sqrt{\frac{N^\phi N}{N + N^\phi}}$  in the original case/control score.  
301 This corrects for the slight reduction in variance of  $R_{jk}^\phi - R_{jk}^0$  because these differently-weighted correlations  
302 are taken over a single cohort of individuals rather than disjoint sets of cases and controls. In practice, we  
303 find this correction factor performs very well in scaling the test statistic variance to 1.

## 304 2.6 Evaluating heterogeneity in SCZ

305 We applied CLiP to test for heterogeneity in case/control data for schizophrenia collected by the Psychiatric  
306 Genomics Consortium (PGC). The data comprise in total roughly 23,000 cases and 28,000 controls and  
307 was the subject of a 2014 meta-analysis reporting 108 schizophrenia-associated loci [31]. We would like to  
308 test whether heterogeneity suggested from clinical observation is also detectable at the level of the PRS  
309 comprising these loci. The PGC data is an aggregate of cohorts collected from many studies conducted  
310 in different populations. Therefore a test for heterogeneity over the all cohorts is likely to be confounded  
311 by ancestry stratification or batch effects between cohorts. We attempt to circumvent these confounding  
312 variables by applying GWAS meta-analysis methods to CLiP scores evaluated over individual cohorts, as well  
313 as evaluating the p-value of the sum of all CLiP scores. As each CLiP score is standard normal distributed

314 over the null, the distribution of their sum has expectation 0 and standard deviation  $\sqrt{N}$  if  $N$  is the number  
315 of cohorts in the sum. To evaluate the significance of CLiP Z-scores across individual cohorts, we applied  
316 Fisher’s method for summing p-values [32].

$$\chi^2 = -2 \sum_{i=1}^K \log p_i \quad (21)$$

317 where  $K$  is the total number of cohorts and  $p_i$  is the p-value of the CLiP heterogeneity score for  
318 cohort  $i$ . The p-value of this test statistic is evaluated on a chi-square distribution with  $2K$  degrees of  
319 freedom. Additionally, we calculated the meta-analysis Z-score of the CLiP score in a manner analogous to  
320 the conventional GWAS approach, but with a 1-tail test for highly positive scores only. The meta-analysis  
321 Z score is calculated according to

$$Z_i = \text{sign}(Z_{CLiP}) \Phi^{-1}(1 - p_i)$$
$$Z = \frac{\sum_{i=1}^K Z_i n_i}{\sqrt{\sum_{i=1}^K n_i^2}} \quad (22)$$

322 where  $Z_{CLiP}$  is the CLiP Z-score evaluated against the expected score with a standard deviation of  
323 1, and  $n_i$  is the sample size of cohort  $i$ . The results of individual cohort tests along with meta-analysis tests  
324 are shown in Table 1.

## 325 2.7 Application to GWAS of Schizophrenia

326 We applied CLiP to GWAS data from the PGC, phased and imputed using SHAPEIT [33] and IMPUTE2  
327 [34], a pipeline with similar or better accuracy compared to other tools according to a recent evaluation  
328 [35]. Imputation was performed using the 1000Genomes Phase 3 reference panel. Roughly half of the PGC  
329 cohorts were mapped with assembly NCBI36, and the SNP coordinates of these data sets were converted to  
330 GRCh37 using the LiftOver tool in the UCSC genome browser database [36]. Individuals were excluded from  
331 further analysis if their percentage of missing data was greater than 0.1 in the 1 Mb region flanking each SNP.  
332 Additionally, of the 108 associated SNPs and indels reported in Ripke et al. [31], six were excluded because

333 they are not listed in the 1000Genomes Phase 3 reference panel, one was excluded due to low variance in  
334 many individual study cohorts, and one was excluded due to mismatching alleles between reported summary  
335 statistics and the reference panel, for a total of 100 variants included in the heterogeneity analysis.

336 To accurately estimate expected heterogeneity scores, the odds ratios reported in Ripke et al. [31]  
337 must be converted to effect sizes on the liability scale. We apply an approximate method reported by Gillett  
338 et al. [37] to convert for variant  $j$  an odds ratio  $OR_j$  to the liability effect  $\beta_j$ :

$$\beta_j \simeq \Phi^{-1}(F_{Logistic}(\log \frac{V}{1-V} + OR_j)) - \Phi^{-1}(V) \quad (23)$$

339 where  $V$  is the disease prevalence (0.01 for schizophrenia), and  $F_{Logistic}(x) = \frac{1}{1+\exp(-x)}$ .

## 340 **3 Results**

### 341 **3.1 Implementation of CLiP**

342 We have implemented the CLiP family of methods with open source availability of the software and auxiliary  
343 code for generating results reported in this paper, available at <https://github.com/jyuan1322/CLiP>. For  
344 the scenarios reported in this manuscript, the runtime to simulate and test a single cohort is always below  
345 5 minutes on a standard machine.

#### 346 **3.1.1 Correlations between effect variables in cases**

347 One of the fundamental claims of Han et al. [30] is that SNPs conferring risk for a disease are uncorrelated  
348 among cases for the disease as well as controls. However, the authors prove this using only for a multi-  
349 plicative binary model, in which an individual's risk is the product of odds ratios of probability of disease  
350 for associated SNPs. The most common model in contrast is a logistic or liability threshold model, in  
351 which these odds ratios are thresholded by a sigmoid function, potentially introducing correlations between  
352 SNPs. In practice the results of logistic or liability threshold regression are very similar, with effect sizes  
353 differing by approximately a constant factor [37]. We first tested the conventional, case-control score for  
354 heterogeneity, as implemented in Han et al. [30], with cases generated from a full logistic model as well as

355 the multiplicative model. We simulated individual data using 100 independent SNPs whose effects were  
356 standard-normally distributed. Across logistic and multiplicative models, the same odds ratios are ascribed  
357 to each SNP to facilitate comparison. Also, for simplicity, we assumed a variance explained of 1 to better  
358 observe the resulting correlation signal. We evaluated the dichotomous-trait score relative to sample sizes  
359 for both homogeneous and heterogeneous groups. The result is shown in Figure 2A, where it is apparent  
360 that the behavior of the two models diverges drastically. In particular, when a logistic model is assumed the  
361 null test statistic is significantly biased towards negative values, indicating widespread negative correlations  
362 between the SNPs that contributed to the liability score, in contrast to the multiplicative model considered  
363 by Han et al. [30]. While true heterogeneity results in positive scores as before, in the logistic model these  
364 scores are also highly attenuated by the negative bias observed in controls. A more detailed discussion of  
365 these negatively correlated SNPs can be found in the Supplemental Material.

### 366 **3.2 Correction for Negative Correlation Bias**

367 To demonstrate the effects of correlated predictors on heterogeneity detection, we evaluated heterogeneity  
368 scores on simulated homogeneous and heterogeneous cohorts. Simulation parameters were set to approximate  
369 those described in a meta-analysis of schizophrenia GWAS by the Psychiatric Genomics Consortium [31],  
370 which describes a PRS over 108 genomewide-significant SNPs with a total variance explained of 0.034,  
371 typical of current GWAS for highly polygenic phenotypes. Genotypes over 100 associated SNPs are sampled  
372 according to a fixed risk-allele frequency of  $p = 0.2$ . Effect sizes are set to a fixed value producing the desired  
373 variance explained in a standard normal PRS distribution. Homogeneous case cohorts were generated by  
374 repeatedly sampling control genotypes and selecting individuals whose PRS pass a threshold corresponding  
375 to a prevalence of 0.01. Heterogeneous cohorts are created by combining an equal number of homogeneous  
376 cases and controls. The scores of these cohorts were evaluated over a range of sample sizes keeping variance  
377 explained constant at 0.034 (Figure 2B), and a range of total variance explained keeping sample size constant  
378 at 30,000 cases and 30,000 controls (Figure 2C). Additionally, we tested the performance of CLiP with respect  
379 to the fraction of individuals in the case mixture that are true cases, shown in in Figure 3A. The color of  
380 each line indicates the size of the entire case cohort, while the X-axis indicates the fraction of individuals of

381 that count that are true cases. When the fraction is 0, the cohort contains only controls, and all expected  
 382 correlations are 0, producing a heterogeneity score of 0. When the fraction is 1, the cohort contains only  
 383 cases, and produces a highly negative score due to negative correlations between all pairs of SNPs. As  
 384 expected, a mixture of cases and controls produces positive scores, with the peak score occurring when the  
 385 cohort is split evenly. More detailed results of this set of simulations are shown in Supplemental Table S2.

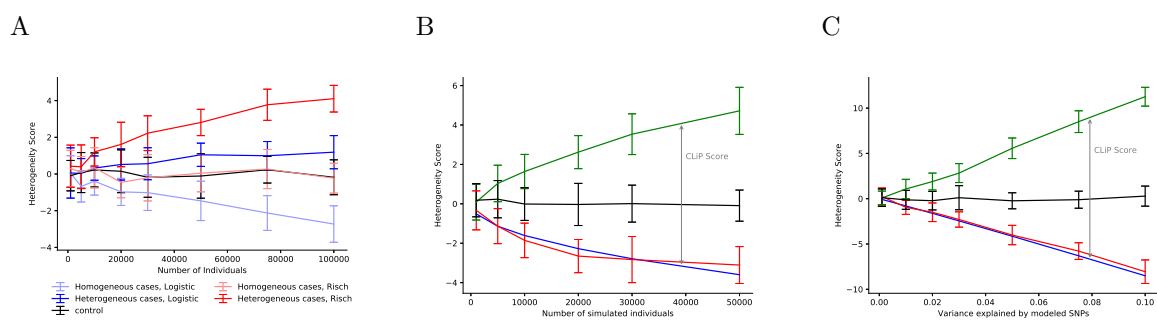

Figure 2: **(A)** Heterogeneity scores (y-axis) across different cohort sizes (x-axis) and genetic architectures. Thresholded models for case/control data such as logistic and probit (liability threshold) regression produce negative correlations between predictors, while the simpler multiplicative (Risch) model does not. Here case/control cohorts are generated from logistic or Risch models with 10 diploid SNPs with allele frequency 0.5 and OR 1.16 (set to keep Risch probabilities  $\leq 1$ ). As described in [30], Risch model cases exhibit no correlations in homogeneous cases, and positive correlations in heterogeneous cases, producing zero and positive heterogeneity scores, respectively. However, in thresholded models, negative correlations in homogeneous models produce negative scores. This negative bias in homogeneous scores is unaccounted for in the method by [30], significantly increasing the probability of type II errors. **(B)** Heterogeneity scores (y-axis) on simulated case/control cohorts as a function of sample size (x-axis) with a fixed variance explained of 0.034 as in [31]. Simulations are run with a PRS of 100 SNPs with total variance explained of 0.034. Heterogeneous cohorts (Green) are equal-proportion mixtures of controls (Black) and homogeneous cases (Red). The expected homogeneous score (Blue) is calculated from effect sizes and allele frequencies of PRS SNPs only, and should be used as the true null score in CLiP. **(C)** Heterogeneity scores (y-axis) as a function of variance explained (x-axis) with a fixed sample size of 30,000 cases and 30,000 controls.

386 We also evaluated the performance of CLiP when heterogeneity consists of multiple potentially inde-  
 387 pendent sub-phenotypes, each with a distinct PRS, such that an individual is considered to be a case when  
 388 it is a case for one or more of these sub-phenotypes. Discovering heterogeneity in these cohorts is more  
 389 challenging because correlations between SNPs involved in different sub-phenotype PRSs are expected to  
 390 be zero rather than positive, and if there are any SNP associations shared between sub-phenotypes, nega-

391 tive correlations will be expected between them despite the presence of distinct sub-phenotypes. We tested  
392 the performance of CLiP by fixing the number of cases and controls at 50,000 each, the total number of  
393 SNPs at 100, and the total variance explained at 0.05, while varying the number of sub-phenotypes and the  
394 fraction of SNPs that are shared across all sub-phenotypes. When this fraction is zero, the sub-phenotypes  
395 are completely independent, and the SNPs are divided into mutually exclusive subsets associated with each  
396 sub-phenotype. When the fraction is non-zero, that fraction of SNPs has the same effect size across all  
397 sub-phenotypes. Results of these simulations are shown in Figure 3B as well as Supplemental Table S1.  
398 Note that by dividing associated SNPs into associations with particular sub-phenotypes, the total variance  
399 explained for each sub-phenotype is reduced, and the observed variance explained of the entire heterogeneous  
400 cohort will be lower in a simple linear regression.

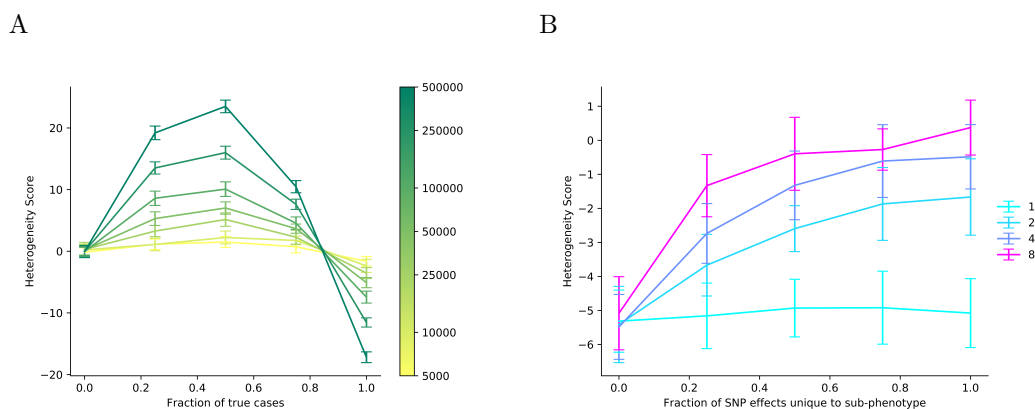

Figure 3: **A** Heterogeneity scores (y-axis) evaluated on heterogeneous cohorts comprising a mixture of true cases and controls at different proportions (x-axis). Colors indicate the total cohort size. All tests were conducted over 50,000 cases and 50,000 controls, with a SNP variance explained of 0.05. **B** Heterogeneity scores (y-axis) evaluated on simulated heterogeneous cohorts with disjoint sub-phenotypes. Performance is shown a function of the fraction of SNP effects unique to a particular sub-phenotype (x-axis). Colors indicate the number of sub-phenotypes. Simulations were performed with 50,000 simulated cases and 50,000 controls, and a total SNP variance explained over all sub-phenotype PRSs set to 0.05.

### 401 3.3 CLiP-Y: Quantitative Phenotypes

402 In practice, we found converting PRSs to percentiles improved performance for all learned weight functions,  
403 possibly because percentiles limit the domain of the PRS function over which the function must be  $\geq 0$ ,

404 and they reduce the contribution to the score calculation by extreme PRS values. We performed this  
405 search for polynomials of increasing degree, finding optimal polynomial functions show in Figure 4A. All  
406 polynomial functions converged to highly similar concave functions. This is due to the balancing effect of the  
407 normalization factor on the sum of correlations: while correlations of PRSs at the high end of the distribution  
408 are more extreme because these individuals more closely resemble “cases,” a high weight value at the higher  
409 end of the PRS spectrum means that the normalization factor also shrinks the magnitude of the score. To  
410 demonstrate that optimal weight functions are concave functions over the range of PRS percentiles, we tested  
411 weight functions that sum up two indicator functions for intervals in  $[0, 1]$ , one increasing, for an interval  
412 ending at 1, and another decreasing, for an interval starting at 0, and evaluated heterogeneity detection  
413 performance, shown in Figure S9. The best performing functions are those where the increasing function  
414 threshold is near but not at 0, and the decreasing function threshold is near but not at 1, producing a  
415 function similar to the concave polynomials found in Figure 4A.

416 In the absence of a method for scoring continuous phenotypes, a naive approach using conventional  
417 heterogeneity scoring [30] would involve setting an arbitrary PRS cutoff by which to partition the cohort  
418 from a continuous phenotype into cases and controls. We compare our continuous heterogeneity test to  
419 cutoffs at various percentiles of PRS's. Both the continuous heterogeneity test and the arbitrary cutoff tests  
420 are standard normally distributed in the null scenario, when no heterogeneity is present. As shown in Figure  
421 4, the continuous heterogeneity test outperforms all thresholded tests by achieving the highest score when  
422 heterogeneity is present. This is consistent across all tested simulation parameters for total genomic variance  
423 explained and number of individuals in the entire cohort. Also note that as expected, the best performing  
424 z-score threshold is some intermediate rather than extreme value. Reducing the threshold too much adds  
425 to much noise to the correlation, and conversely raising it too high reduces the number of cases and hence  
426 the detectable signal too much. From the tests shown in Figure 4, a threshold near the center of the PRS  
427 distribution seems close to optimal, but this is significantly outperformed by the continuous method. Plotted  
428 here are the differences in heterogeneous and homogeneous cohorts, with the homogeneous cohorts being the  
429 true null value of the score. The scores for these cohorts individually are shown in Supplemental Figures S4  
430 to S7.

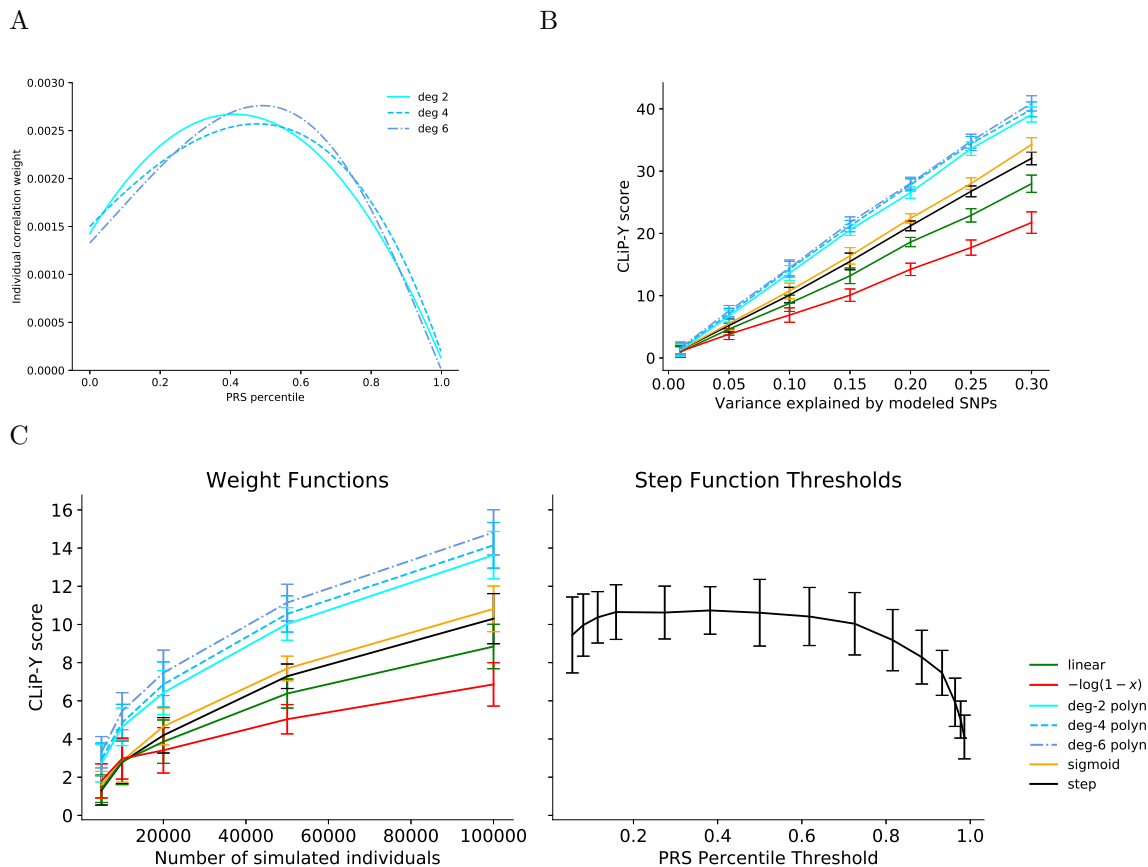

Figure 4: **A** Learned weight functions  $\phi(x)$  for scoring heterogeneity in quantitative phenotypes. A local search over polynomial coefficients is performed such that the resulting function maximizes the difference between the heterogeneity scores of simulated samples of homogeneous and heterogeneous cohorts. **B** Tests for heterogeneity in quantitative phenotypes using multiple weighting functions over individuals, including those in **A**, as a function of variance explained by the PRS. Plotted are scores of heterogeneous cohorts minus the expected score of a homogeneous cohort over 20 trials. One Hundred SNPs are simulated with cohorts of 100,000 individuals. **C** Tests for heterogeneity in quantitative phenotypes using multiple weight functions. Plotted are mean scores of heterogeneous cohorts minus the expected score of a homogeneous cohort over 20 trials, as a function of sample size. One hundred SNPs are simulated with a total variance explained of 0.1. For comparison these scores are plotted on the same Y-axis as scores generated from step function weights at various thresholds on the percentile scale of a standard normal quantitative phenotype distribution. For each of these step function scores, the expected homogeneous score is estimated by the mean of 20 sampled homogeneous cohorts, to limit computation time. For all weight functions and test conditions, expected homogeneous scores are near-exact estimates of the means of simulated scores, as shown in Supplemental Figures S5A and S7A.



### 3.4 CLiP-X: Quantitative Predictors

We generate cases and controls for both homogeneous and heterogeneous transcriptome-wide association cohorts, with 100 simulated SNPs generating 10 transcriptome-level variables. We run 20 trials across a range of sample sizes and total genomic variance explained, controlled by the value of  $\epsilon$  in equation 4, to evaluate the performance of the continuous variable test statistic in true heterogeneous cohorts, homogeneous case cohorts, and independently sampled control cohorts. The results are presented in Figure 5 and Supplemental Figure S3.

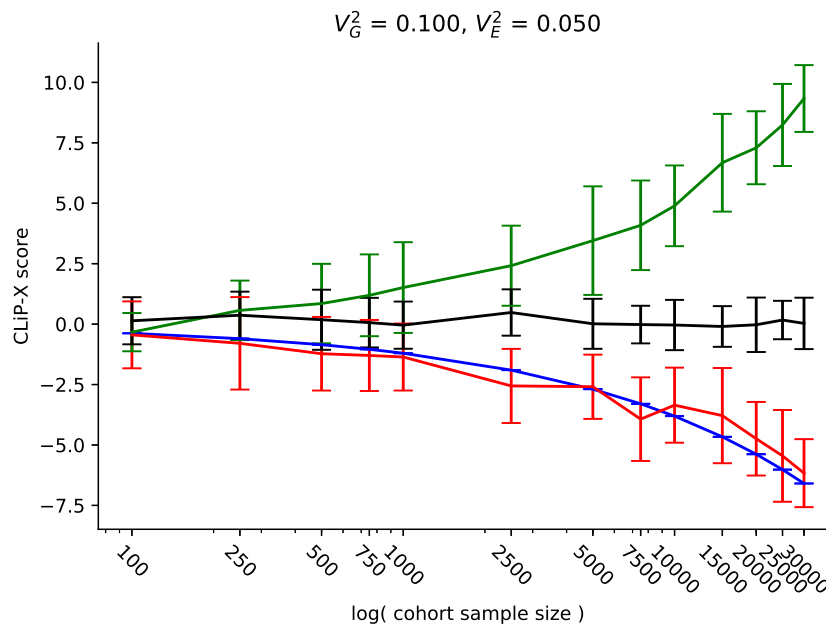

Figure 5: Heterogeneity scores with continuous input predictors generated according to Supplemental Algorithm 1 and Supplemental Figure SS2. Controls (**Black**) have no criteria for selection placed on their generated quantitative predictors; homogeneous cases (**Red**) are selected according to a liability threshold over predictors; and heterogeneous cases (**Green**) are an even combination of controls and homogeneous cases. The **Blue** line indicates expected mean scores of homogeneous cohorts calculated from summary statistics of the quantitative predictors. As with discrete SNPs, quantitative predictors are negatively correlated among homogeneous cases.

Shown in Figure 5 are results with a sample size of 100,000 and a total variance explained of  $h_E^2 = 0.05$  by quantitative predictors. We observe that for all sample sizes, the heterogeneity score is approximately

440 distributed with mean 0 and standard deviation 1 in control cohorts. As predicted, the homogeneous case  
441 group exhibits highly negative correlations between associated SNPs, and the resulting CLiP-X score can  
442 be accurately estimated from expected correlations (Blue) using knowledge of summary statistics only. This  
443 estimate should serve as the null when evaluating GWAS cohorts in practice, when a truly homogeneous  
444 cohort is not available. By comparison to this true null, many more heterogeneous cohorts are detectable  
445 which would not have passed a significance threshold with the null centered at 0, especially those with sample  
446 sizes of less than 10,000 cases.

### 447 **3.5 Application to GWAS of Schizophrenia**

448 After transforming PGC effect sizes to the liability scale (see Methods), the total variance explained by the  
449 100 genomewide significant SNPs considered (see Methods) was approximately 0.027, suitably close to the  
450 0.03 SNP variance explained reported in Ripke et al. [31]. We calculated heterogeneity scores for cases  
451 and controls over individual cohorts, shown in Figure 6, as well as meta-analysis scores over all cohorts as  
452 described in the methods, shown in Table 1. Generally, we observe more positive heterogeneity scores for  
453 larger cohorts, though only three pass a significance p-value threshold of 0.05. The scores in Table 1 are  
454 organized by ascending p-value, and a Benjamini-Hochberg procedure is conducted with a false-discovery  
455 rate of  $\frac{1}{3}$ . Cohorts with p-values lower than the critical values determined by this FDR are separated by a  
456 dashed line. On an individual basis the vast majority of these cohorts are too small to be conclusively tested  
457 for heterogeneity, as the sample variances of correlations between SNPs is high. By performing a single test  
458 over all cases and controls, we obtain a significant p-value of  $8.54e - 4$ , though some heterogeneity may be  
459 contributed by batch effects. By summing scores across cohorts, we obtain a larger but still significant p-value  
460 of 0.011, suggesting that while batch effects contribute to detected heterogeneity, they do not completely  
461 account for all heterogeneity observed in the data. Lastly, by applying meta-analysis methods over individual  
462 cohort scores, we obtain a Fisher's  $\chi^2$  p-value of 0.030, and a Z-score of 2.03, also supporting the presence  
463 of a significant heterogeneity signal.

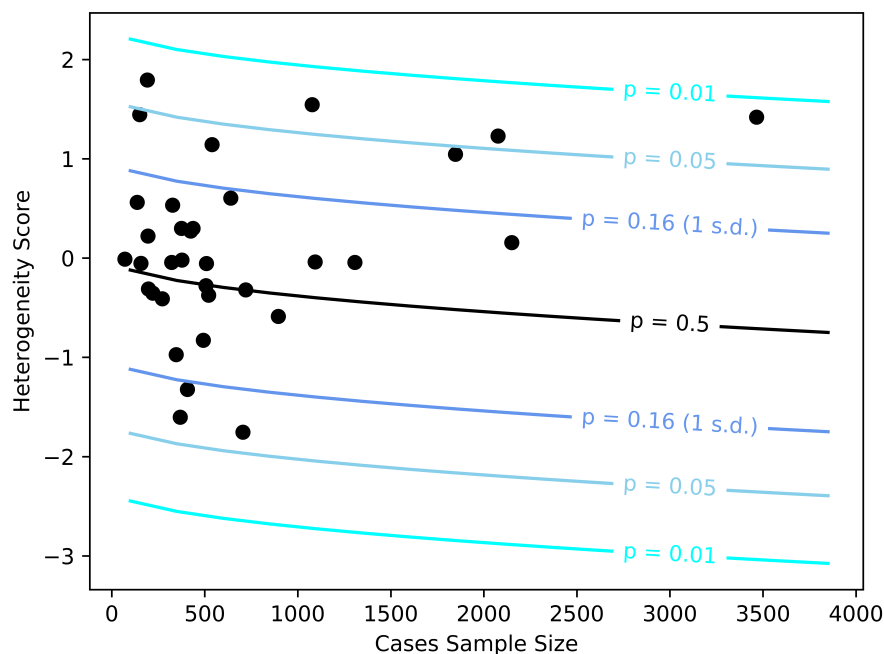

Figure 6: CLiP heterogeneity scores evaluated over single cohorts in the PGC schizophrenia data set, plotted by the number of genotyped cases. The black line denotes the expected score given summary statistics reported in [31] and sample sizes specific to each cohort, and the shaded region denotes z-score thresholds corresponding to particular p-values of significance.

## 464 4 Discussion

465 We present a general framework for identifying hidden heterogeneity among cases for multiple phenotypes  
466 by observing correlations between genotypes. Specifically, we derive modified test statistics to account  
467 for non-genotype input variables such as expression data, which may be continuous and sampled from  
468 any distribution with known mean and variance. Additionally, we allow for heterogeneity to be scored in  
469 quantitative phenotypes, that lack the clear-cut ascertainment of cases vs. controls that facilitates a simple  
470 dichotomous contrast of correlation patterns. Our novel, generalized framework is facilitates distinction  
471 between situations of heterogeneous subtyping and those of true pleiotropy, in which the set of individuals

| Cohort | Num Cases/Conts | CLiP Score | Expected Score | p-value | FDR critical val |
|--------|-----------------|------------|----------------|---------|------------------|
| clm2   | 3466/4297       | 1.42       | -0.77          | 0.014   | 0.010            |
| gras   | 1077/1226       | 1.55       | -0.42          | 0.025   | 0.020            |
| zhh1*  | 191/190         | 1.79       | -0.17          | 0.025   | 0.029            |
| s234   | 2076/2341       | 1.23       | -0.57          | 0.036   | 0.039            |
| pews   | 150/236         | 1.45       | -0.16          | 0.054   | 0.049            |
| boco   | 1847/2169       | 1.05       | -0.55          | 0.056   | 0.059            |
| cou3   | 539/692         | 1.14       | -0.31          | 0.073   | 0.069            |
| pewb   | 640/1892        | 0.60       | -0.38          | 0.163   | 0.078            |
| clo3   | 2150/2083       | 0.16       | -0.57          | 0.233   | 0.088            |
| lie2   | 137/268         | 0.56       | -0.17          | 0.234   | 0.098            |
| msaf   | 327/139         | 0.53       | -0.17          | 0.241   | 0.108            |
| umeb   | 375/584         | 0.30       | -0.26          | 0.286   | 0.118            |
| munc   | 437/351         | 0.30       | -0.24          | 0.294   | 0.127            |
| caws*  | 424/305         | 0.27       | -0.23          | 0.307   | 0.137            |
| bulb   | 195/608         | 0.22       | -0.21          | 0.332   | 0.147            |
| swe6   | 1093/1217       | -0.04      | -0.42          | 0.352   | 0.157            |
| irwt   | 1307/1022       | -0.04      | -0.41          | 0.357   | 0.167            |
| top8   | 377/403         | -0.02      | -0.24          | 0.414   | 0.176            |
| asrb   | 509/310         | -0.05      | -0.24          | 0.426   | 0.186            |
| ersw   | 322/332         | -0.04      | -0.23          | 0.428   | 0.196            |
| lacw   | 157/466         | -0.05      | -0.19          | 0.445   | 0.206            |
| cims   | 71/69           | -0.01      | -0.10          | 0.463   | 0.216            |
| aber   | 720/699         | -0.32      | -0.33          | 0.497   | 0.225            |
| lie5   | 506/387         | -0.28      | -0.25          | 0.510   | 0.235            |
| umes   | 197/713         | -0.31      | -0.21          | 0.539   | 0.245            |
| uclo*  | 521/494         | -0.37      | -0.27          | 0.540   | 0.255            |
| dubl   | 272/860         | -0.41      | -0.25          | 0.562   | 0.265            |
| swe1   | 221/214         | -0.35      | -0.18          | 0.567   | 0.274            |
| ajsz   | 895/1593        | -0.59      | -0.41          | 0.572   | 0.284            |
| denm   | 492/458         | -0.83      | -0.27          | 0.713   | 0.294            |
| port*  | 346/216         | -0.97      | -0.20          | 0.781   | 0.304            |
| cati   | 407/391         | -1.32      | -0.24          | 0.860   | 0.314            |
| edin   | 368/284         | -1.60      | -0.22          | 0.916   | 0.323            |
| ucla   | 705/637         | -1.75      | -0.32          | 0.925   | 0.333            |
| All    | 23517/28146     | 1.20       | -1.93          | 8.54e-4 |                  |

Table 1: CLiP heterogeneity scores for individual cohorts and their combination. Cohorts with an asterisk have had a SNP excluded which has zero variance within either the case or control cohort, resulting in an undefined correlation. An FDR of  $\frac{1}{3}$  was used for Benjamini-Hochberg analysis.

472 with each disease are themselves homogeneous.

473 A natural next step for these two methods is to combine them for scenarios of continuous inputs and  
474 continuous phenotypes, simultaneously. This is doable as the weighting procedures apply separately within  
475 the test statistic calculation to SNP level features and individual level features, respectively.

476 We further demonstrated that existing theory for heterogeneity scoring [30], assuming on a traditional  
477 multiplicative model, can be applied to more modernly accepted logistic- and liability-threshold-models. We  
478 showed that the existing score assumes independence between SNPs that is absent from modern models. It  
479 therefore fails to account for a negative bias in the score due to negatively correlated SNPs, implying an  
480 excess of false negatives and motivating recalibration.

481 The real data results presented in this manuscript only consider PRS based on SNPs whose association  
482 signals are genome-wide significant. This removes concerns of false positive associations within the PRS. PRS  
483 constructions that do include lower-significance SNPs explain more heritability, and are an attractive next  
484 challenge for finding heterogeneity signals. Aside for the statistical challenge, this future work would require  
485 handling much larger sets of SNPs, and therefore matrices of correlations. Application of CLiP-Y to real  
486 quantitative GWAS, and CLiP-X to TWAS is still limited by related issues of small association signals or low  
487 variance explained by significant predictors. CLiP-X with measured expression data requires larger cohorts  
488 that typically assembled, as mega-analysis is often hampered by batch effects.

489 Given the above extensions to the correlation-based framework, it can now be applied broadly across  
490 many different traits to look for genotypic heterogeneity among cases in diseases with previously reported  
491 pleiotropic effects. While detection of heterogeneity signifies that the involved SNPs cannot be considered  
492 strictly pleiotropic, heterogeneity also suggests that distinct subgroups of significant size for a separate  
493 phenotype must exist among the cases for a particular primary phenotype under study. As incidence rates for  
494 most diseases are low, detection of significant heterogeneity may suggest a higher degree of comorbidity than  
495 is expected at random. Therefore, among disease pairs for which heterogeneity is discovered, identifying the  
496 particular subgroups underlying an elevated heterogeneity score may lead to further insights into pleiotropic  
497 interactions between phenotypes. Lastly, this framework presents the possibility of screening a large number  
498 of potentially pleiotropic secondary phenotypes against a single primary phenotype of interest. All that is

499 required is a cohort pertaining to the primary phenotype, and a set of SNPs associated with the second  
500 phenotype whose correlations are to be evaluated over the cohort.

501 At the grander scheme of human genetics, generalized testing for heterogeneity paves the way for  
502 recovering additional layers of the network of effects that explain traits by interacting genetic and other  
503 factors. Going beyond the the first-order, linear approximation of these effects holds the promise of better  
504 explaining mechanisms beyond identification of their contributing input factors.

## 505 **5 Declaration of Interests**

506 The authors declare no competing interests.

## 507 **6 Acknowledgements**

508 This work was supported in part by grant R01 MH117646-02S1 from the National Institutes of Health to T.L.  
509 Itsik Pe'er is supported by grants CCF-1547120 and DGE-1144854 from the National Science Foundation  
510 as well as grant U54CA209997 from the National Institutes of Health.

## 511 **7 Web Resources**

512 A Github page for CLiP, including code to reproduce figures is available at:

513 <https://github.com/jyuan1322/CLiP>

## 514 **References**

- 515 [1] Peter M Visscher, Naomi R Wray, Qian Zhang, Pamela Sklar, Mark I McCarthy, Matthew A Brown,  
516 and Jian Yang. 10 years of gwas discovery: biology, function, and translation. *The American Journal*  
517 *of Human Genetics*, 101(1):5–22, 2017.
- 518 [2] Danielle Welter, Jacqueline MacArthur, Joannella Morales, Tony Burdett, Peggy Hall, Heather Junkins,

- 519 Alan Klemm, Paul Flicek, Teri Manolio, Lucia Hindorff, et al. The nhgri gwas catalog, a curated resource  
520 of snp-trait associations. *Nucleic acids research*, 42(D1):D1001–D1006, 2013.
- 521 [3] Naomi R Wray, Michael E Goddard, and Peter M Visscher. Prediction of individual genetic risk to  
522 disease from genome-wide association studies. *Genome research*, 17(10):000–000, 2007.
- 523 [4] Stacey L Edwards, Jonathan Beesley, Juliet D French, and Alison M Dunning. Beyond gwass: illumi-  
524 nating the dark road from association to function. *The American Journal of Human Genetics*, 93(5):  
525 779–797, 2013.
- 526 [5] Evan A Boyle, Yang I Li, and Jonathan K Pritchard. An expanded view of complex traits: from  
527 polygenic to omnigenic. *Cell*, 169(7):1177–1186, 2017.
- 528 [6] Xuanyao Liu, Yang I Li, and Jonathan K Pritchard. Trans effects on gene expression can drive omnigenic  
529 inheritance. *Cell*, 177(4):1022–1034, 2019.
- 530 [7] Samsiddhi Bhattacharjee, Preetha Rajaraman, Kevin B Jacobs, William A Wheeler, Beatrice S Melin,  
531 Patricia Hartge, Meredith Yeager, Charles C Chung, Stephen J Chanock, Nilanjan Chatterjee, et al.  
532 A subset-based approach improves power and interpretation for the combined analysis of genetic as-  
533 sociation studies of heterogeneous traits. *The American Journal of Human Genetics*, 90(5):821–835,  
534 2012.
- 535 [8] Molin Wang, Donna Spiegelman, Aya Kuchiba, Paul Lochhead, Sehee Kim, Andrew T Chan, Eliza-  
536 beth M Poole, Rulla Tamimi, Shelley S Tworoger, Edward Giovannucci, et al. Statistical methods for  
537 studying disease subtype heterogeneity. *Statistics in medicine*, 35(5):782–800, 2016.
- 538 [9] Yuri Milaneschi, Femke Lamers, Wouter J Peyrot, Abdel Abdellaoui, Gonneke Willemsen, Jouke Jan  
539 Hottenga, Rick Jansen, Hamdi Mbarek, Abbas Dehghan, Chen Lu, et al. Polygenic dissection of major  
540 depression clinical heterogeneity. *Molecular psychiatry*, 21(4):516, 2016.
- 541 [10] AW Charney, DM Ruderfer, EA Stahl, JL Moran, K Chambert, RA Belliveau, L Forty, Katherine  
542 Gordon-Smith, A Di Florio, PH Lee, et al. Evidence for genetic heterogeneity between clinical subtypes  
543 of bipolar disorder. *Translational psychiatry*, 7(1):e993, 2017.

- 544 [11] Deborah S Cunninghame Graham. Genome-wide association studies in systemic lupus erythematosus:  
545 a perspective, 2009.
- 546 [12] Giulio Disanto, Antonio J Berlanga, Adam E Handel, Andrea E Para, Amy M Burrell, Anastasia Fries,  
547 Lahiru Handunnetthi, Gabriele C De Luca, and Julia M Morahan. Heterogeneity in multiple sclerosis:  
548 scratching the surface of a complex disease. *Autoimmune Diseases*, 2011, 2011.
- 549 [13] Candace T Myers and Heather C Mefford. Advancing epilepsy genetics in the genomic era. *Genome*  
550 *medicine*, 7(1):91, 2015.
- 551 [14] Na He, Zhi-Jian Lin, Jie Wang, Feng Wei, Heng Meng, Xiao-Rong Liu, Qian Chen, Tao Su, Yi-Wu Shi,  
552 Yong-Hong Yi, et al. Evaluating the pathogenic potential of genes with de novo variants in epileptic  
553 encephalopathies. *Genetics in Medicine*, 21(1):17, 2019.
- 554 [15] Anne Hinks, Joanna Cobb, Miranda C Marion, Sampath Prahalad, Marc Sudman, John Bowes, Paul  
555 Martin, Mary E Comeau, Satria Sajuthi, Robert Andrews, et al. Dense genotyping of immune-related  
556 disease regions identifies 14 new susceptibility loci for juvenile idiopathic arthritis. *Nature genetics*, 45  
557 (6):664, 2013.
- 558 [16] Naomi R Wray and Robert Maier. Genetic basis of complex genetic disease: the contribution of disease  
559 heterogeneity to missing heritability. *Current Epidemiology Reports*, 1(4):220–227, 2014.
- 560 [17] Alicia R Martin, Masahiro Kanai, Yoichiro Kamatani, Yukinori Okada, Benjamin M Neale, and Mark J  
561 Daly. Clinical use of current polygenic risk scores may exacerbate health disparities. *Nature genetics*,  
562 51(4):584, 2019.
- 563 [18] Hakhamanesh Mostafavi, Arbel Harpak, Dalton Conley, Jonathan K Pritchard, and Molly Przeworski.  
564 Variable prediction accuracy of polygenic scores within an ancestry group. *BioRxiv*, page 629949, 2019.
- 565 [19] Javier Arnedo, Dragan M Svrakic, Coral Del Val, Rocío Romero-Zaliz, Helena Hernández-Cuervo,  
566 Molecular Genetics of Schizophrenia Consortium, Ayman H Fanous, Michele T Pato, Carlos N Pato,  
567 Gabriel A de Erausquin, et al. Uncovering the hidden risk architecture of the schizophrenias: confir-



- 568 mation in three independent genome-wide association studies. *American Journal of Psychiatry*, 172(2):  
569 139–153, 2015.
- 570 [20] Jaime Derringer. Explaining heritable variance in human character. *bioRxiv*, page 446518, 2018.
- 571 [21] Gerome Breen, Brendan Bulik-Sullivan, Mark Daly, Sarah Medland, Benjamin Neale, Michael  
572 O’Donovan, Stephan Ripke, Patrick Sullivan, Peter Visscher, and Naomi Wray. Eight types of  
573 schizophrenia? not so fast. <http://genomesunzipped.org>, 2014.
- 574 [22] Andy Dahl, Na Cai, Arthur Ko, Markku Laakso, Päivi Pajukanta, Jonathan Flint, and Noah Zaitlen.  
575 Reverse gwas: Using genetics to identify and model phenotypic subtypes. *PLoS genetics*, 15(4):e1008009,  
576 2019.
- 577 [23] Jacob Gratten and Peter M Visscher. Genetic pleiotropy in complex traits and diseases: implications  
578 for genomic medicine. *Genome medicine*, 8(1):78, 2016.
- 579 [24] Rudolf Uher and Alyson Zwickler. Etiology in psychiatry: embracing the reality of poly-gene-  
580 environmental causation of mental illness. *World Psychiatry*, 16(2):121–129, 2017.
- 581 [25] George W Brown, Maria Ban, Thomas KJ Craig, Tirril O Harris, Joe Herbert, and Rudolf Uher.  
582 Serotonin transporter length polymorphism, childhood maltreatment, and chronic depression: a specific  
583 gene–environment interaction. *Depression and Anxiety*, 30(1):5–13, 2013.
- 584 [26] S Hong Lee, Stephan Ripke, Benjamin M Neale, Stephen V Faraone, Shaun M Purcell, Roy H Perlis,  
585 Bryan J Mowry, Anita Thapar, Michael E Goddard, John S Witte, et al. Genetic relationship between  
586 five psychiatric disorders estimated from genome-wide snps. *Nature genetics*, 45(9):984, 2013.
- 587 [27] Shaun M Purcell, Naomi R Wray, Jennifer L Stone, Peter M Visscher, Michael C O’Donovan, Patrick F  
588 Sullivan, and Pamela Sklar. Common polygenic variation contributes to risk of schizophrenia and  
589 bipolar disorder. *Nature*, 460(7256):748–752, 2009.
- 590 [28] Douglas M Ruderfer, Stephan Ripke, Andrew McQuillin, James Boocock, Eli A Stahl, Jennifer M White-  
591 head Pavlides, Niamh Mullins, Alexander W Charney, Anil PS Ori, Loes M Olde Loohuis, et al. Genomic

- 592 dissection of bipolar disorder and schizophrenia, including 28 subphenotypes. *Cell*, 173(7):1705–1715,  
593 2018.
- 594 [29] Todd Lencz, Saurav Guha, Chunyu Liu, Jeffrey Rosenfeld, Semanti Mukherjee, Pamela DeRosse, Majnu  
595 John, Lijun Cheng, Chunling Zhang, Judith A Badner, et al. Genome-wide association study implicates  
596 *ndst3* in schizophrenia and bipolar disorder. *Nature communications*, 4:2739, 2013.
- 597 [30] Buhm Han, Jennie G Pouget, Kamil Slowikowski, Eli Stahl, Cue Hyunkyoo Lee, Dorothee Diogo, Xinli  
598 Hu, Yu Rang Park, Eunji Kim, Peter K Gregersen, et al. A method to decipher pleiotropy by detecting  
599 underlying heterogeneity driven by hidden subgroups applied to autoimmune and neuropsychiatric  
600 diseases. *Nature genetics*, 48(7):803, 2016.
- 601 [31] Stephan Ripke, Benjamin M Neale, Aiden Corvin, James TR Walters, Kai-How Farh, Peter A Holmans,  
602 Phil Lee, Brendan Bulik-Sullivan, David A Collier, Hailiang Huang, et al. Biological insights from 108  
603 schizophrenia-associated genetic loci. *Nature*, 511(7510):421, 2014.
- 604 [32] Evangelos Evangelou and John PA Ioannidis. Meta-analysis methods for genome-wide association  
605 studies and beyond. *Nature Reviews Genetics*, 14(6):379, 2013.
- 606 [33] Olivier Delaneau, Jonathan Marchini, and Jean-François Zagury. A linear complexity phasing method  
607 for thousands of genomes. *Nature methods*, 9(2):179, 2012.
- 608 [34] Bryan Howie, Christian Fuchsberger, Matthew Stephens, Jonathan Marchini, and Gonçalo R Abecasis.  
609 Fast and accurate genotype imputation in genome-wide association studies through pre-phasing. *Nature*  
610 *genetics*, 44(8):955, 2012.
- 611 [35] Ehsan Ullah, Raghvendra Mall, Mostafa M Abbas, Khalid Kunji, Alejandro Q Nato, Halima Bensmail,  
612 Ellen M Wijsman, and Mohamad Saad. Comparison and assessment of family-and population-based  
613 genotype imputation methods in large pedigrees. *Genome research*, 29(1):125–134, 2019.
- 614 [36] Maximilian Haeussler, Ann S Zweig, Cath Tyner, Matthew L Speir, Kate R Rosenbloom, Brian J Raney,  
615 Christopher M Lee, Brian T Lee, Angie S Hinrichs, Jairo Navarro Gonzalez, et al. The ucsc genome  
616 browser database: 2019 update. *Nucleic acids research*, 47(D1):D853–D858, 2018.

617 [37] Alexandra C Gillett, Evangelos Vassos, and Cathryn Lewis. Transforming summary statistics from  
618 logistic regression to the liability scale: application to genetic and environmental risk scores. *bioRxiv*,  
619 page 385740, 2018.
